# Supplementary material for: Computing metasurface capable of broad-band switchable anisotropic edge-enhanced imaging
Source: Royal Society of Chemistry journal article supplement (doi:10.1039/d3tc00092c), 2023-01-01
Supplement: d3tc00092c1.pdf [file d3tc00092c1.pdf]

## Supporting Information

### Computing Metasurface Capable of Broad-Band Switchable Anisotropically Edge-Enhanced Imaging

*Qun Hao,<sup>1</sup> Wenli Wang,<sup>1</sup> Jing Wang,<sup>2</sup> Qianhui Li,<sup>1</sup> Yao Hu,<sup>\*1</sup> Shaohui Zhang,<sup>1</sup> and Liandong Yu<sup>2</sup>*

1. Beijing Key Laboratory for Precision Optoelectronic Measurement Instrument and Technology, School of Optics and Photonics, Beijing Institute of Technology, Beijing 100081, China
2. College of Control Science and Engineering, China University of Petroleum, No.66, West Changjiang Road, Qingdao, 266580, China.

#### Corresponding Author:

Yao Hu

Email: huy08@bit.edu.cn

**Supplementary Note 1: Comparison of the theoretical output results corresponding to different  $\rho_0$**

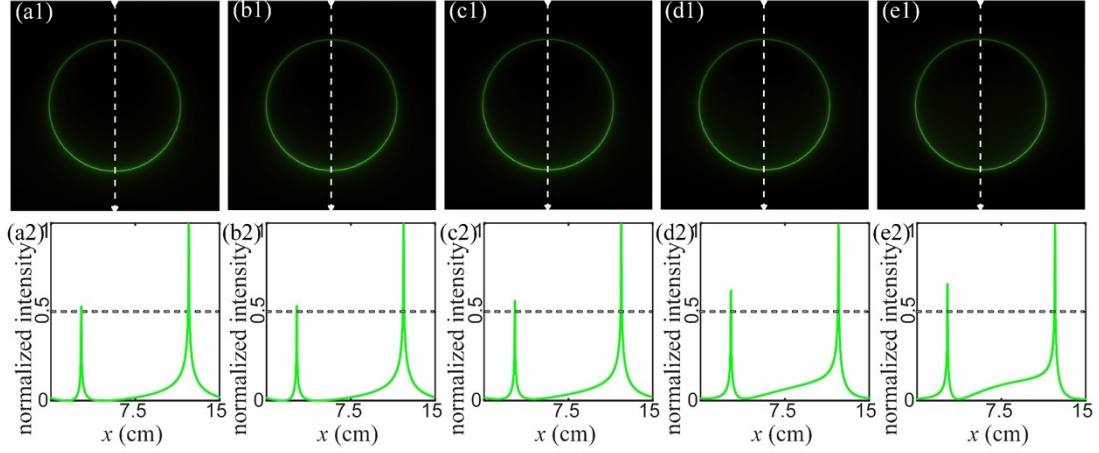

Fig.s1. the theoretical output results corresponding to designed  $H(f_x, f_y)$  when a circular pattern is the input object. (a1)~ (e1) are theoretical output results as we set the  $\rho_0$  as  $0.001\rho^{1/2}$ ,  $0.01\rho^{1/2}$ ,  $0.15\rho^{1/2}$ ,  $0.5\rho^{1/2}$ ,  $0.8\rho^{1/2}$ , respectively. (a2)~ (e2) are the cross-sectional intensity curves of (a1) ~ (e1) along the white dashed lines. The black dashed lines are used as reference lines.

**Supplementary Note 2: The designed phase maps of our metasurfaces and corresponding near-field phase distributions.**

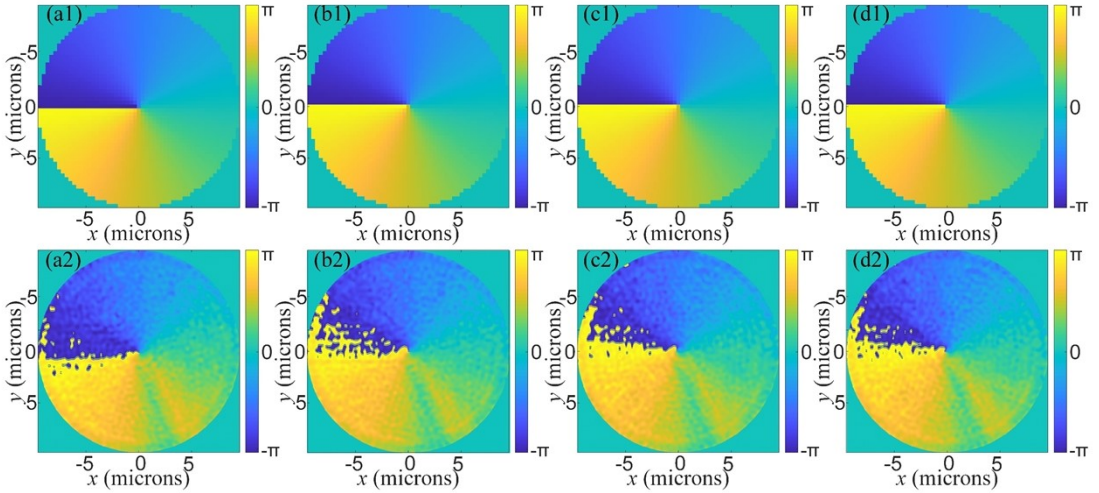

Fig.s2. (a1)~ (d1) are, respectively, the phase maps calculated by equations 3,4,8 and 9. (a2) and (b2) are, respectively, the RCP or LCP near-field phase distributions generated by metasurface 1 under the illumination of an LCP or RCP incident beam. (c2) and (d2) are, respectively, the RCP or LCP near-field phase distributions generated by metasurface 2 under the illumination of an LCP or RCP incident beam.

**Supplementary Note 3: The near-field phase patterns of the vortex beam generated by metasurface 1 under the illumination of 480 and 630nm incident beam**

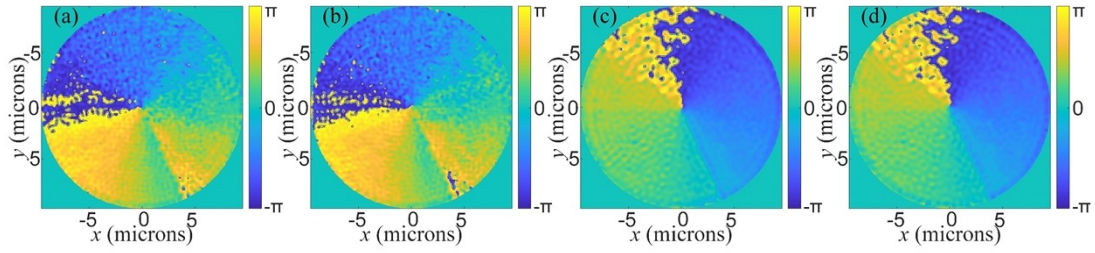

Fig.s3. (a) and (b) are, respectively, the RCP or LCP near-field phase distributions of metasurface 1 under the illumination of an LCP or RCP incident beam ( $\lambda=480\text{nm}$ ); (c) and (d) are, respectively, the RCP or LCP near-field phase distributions of metasurface 1 under the illumination of an LCP or RCP incident beam ( $\lambda=630\text{nm}$ ).

**Supplementary Note 4: The choice of the nanopillars in our metasurfaces**

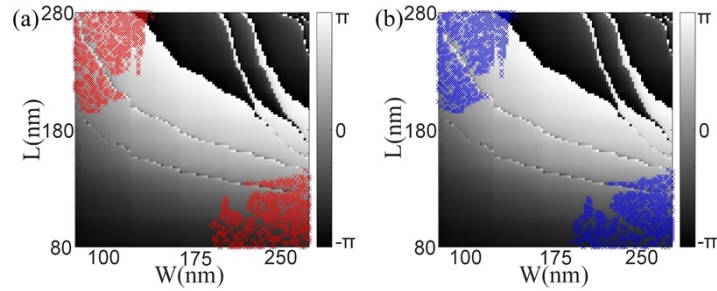

Fig.s4. (a) the phase library  $\delta_x$  used for metasurface 1, the areas highlighted in red are the selected nanopillars. (b) the phase library  $\delta_x$  used for metasurface 2, the areas highlighted in blue are the selected nanopillars.
